# Supplementary material for: Green and efficient catalytic oxidation of ethylbenzene to acetophenone over cobalt oxide supported on a carbon material derived from sugar
Source: Royal Society of Chemistry journal article supplement (doi:10.1039/d4cp02803a), 2024-01-01
Supplement: d4cp02803a1.pdf [file d4cp02803a1.pdf]

## **Green and efficient catalytic oxidation of ethylbenzene to acetophenone over cobalt oxide supported on carbon material derived from sugar**

Jinhong Li<sup>a</sup>, Zhimei Song<sup>a</sup>, Kaikai Cui<sup>b</sup>, Haonan Li<sup>a</sup>, Mei Han<sup>a</sup>, Jinge Wang<sup>a</sup>, Lidong Chen<sup>\*a</sup>

a. School of Chemistry and Chemical Engineering, Liaoning Normal University, Dalian, 110629, Liaoning, PR China

b. BEFAR Technology Company, Binzhou, Shandong, 256600, PR China

## 2. Experimental section

### 2.1. Catalyst preparation

Table S1 Primary materials in the experiment

| Chemicals                                        | Chemical formula                                               | Purity | Sources of Chemicals                                                          |
|--------------------------------------------------|----------------------------------------------------------------|--------|-------------------------------------------------------------------------------|
| cobalt acetate                                   | $(\text{CH}_3\text{COOH})_2\text{Co}\cdot 4\text{H}_2\text{O}$ | AR     | Sinopharm Chemical Co.,Ltd.                                                   |
| acetic acid                                      | $\text{CH}_3\text{COOH}$                                       | AR     | Sinopharm Chemical Co.,Ltd.                                                   |
| acetonitrile                                     | $\text{CH}_3\text{CN}$                                         | AR     | Sinopharm Chemical Co.,Ltd.                                                   |
| potassium bromide                                | KBr                                                            | AR     | Tianjin Kemiou Chemical Reagent Co., Ltd                                      |
| alcohol                                          | $\text{C}_2\text{H}_5\text{OH}$                                | AR     | Tianjin Kemiou Chemical Reagent Co., Ltd                                      |
| hydrochloric acid                                | HCl                                                            | AR     | Tianjin Kemiou Chemical Reagent Co., Ltd                                      |
| ethylbenzene                                     | $\text{C}_6\text{H}_6$                                         | AR     | Beijing Energy Engineering Technologies Co.,Ltd.                              |
| Hydrogen peroxide                                | $\text{H}_2\text{O}_2$                                         | 30%    | Xinxing reagent co., ltd.                                                     |
| sugar                                            |                                                                |        | Zuoyuan Group Co., Ltd.                                                       |
| edible sugar<br>(production in<br>February 2022) |                                                                |        | Nanchang Economic and Technological Development Zone<br>Hongping Food Factory |

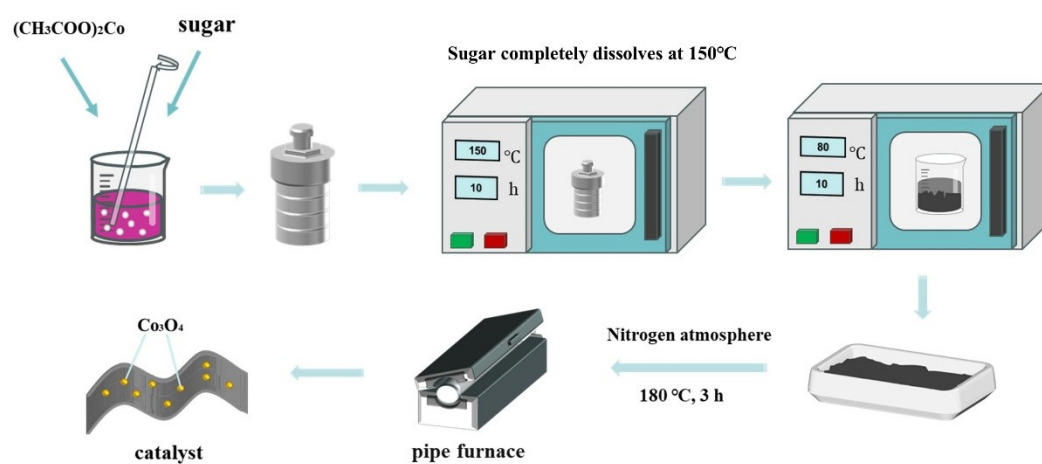

Fig.S1 The preparation process of  $\text{CoO}_x/\text{SC}-10$  *in situ*.

### 3. Results and discussion

#### 3.1. Catalyst characterization

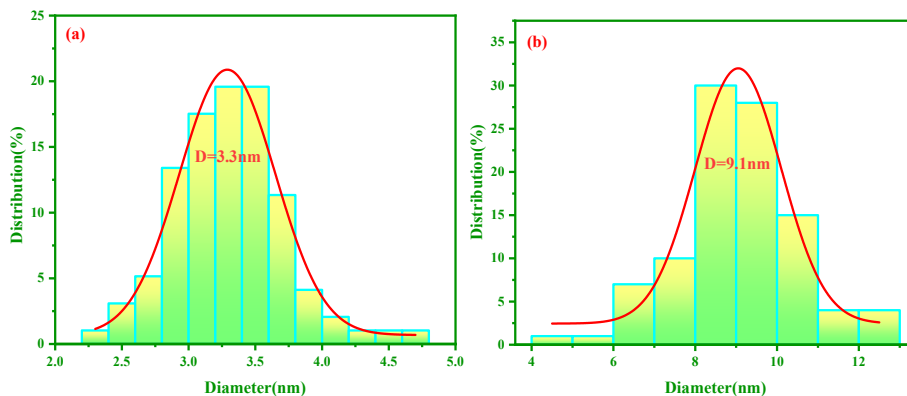

Fig.S2 Particle size distribution of (a)CoO<sub>x</sub>/SC-10-*in situ*, (b)CoO<sub>x</sub>/SC-10-*im*.

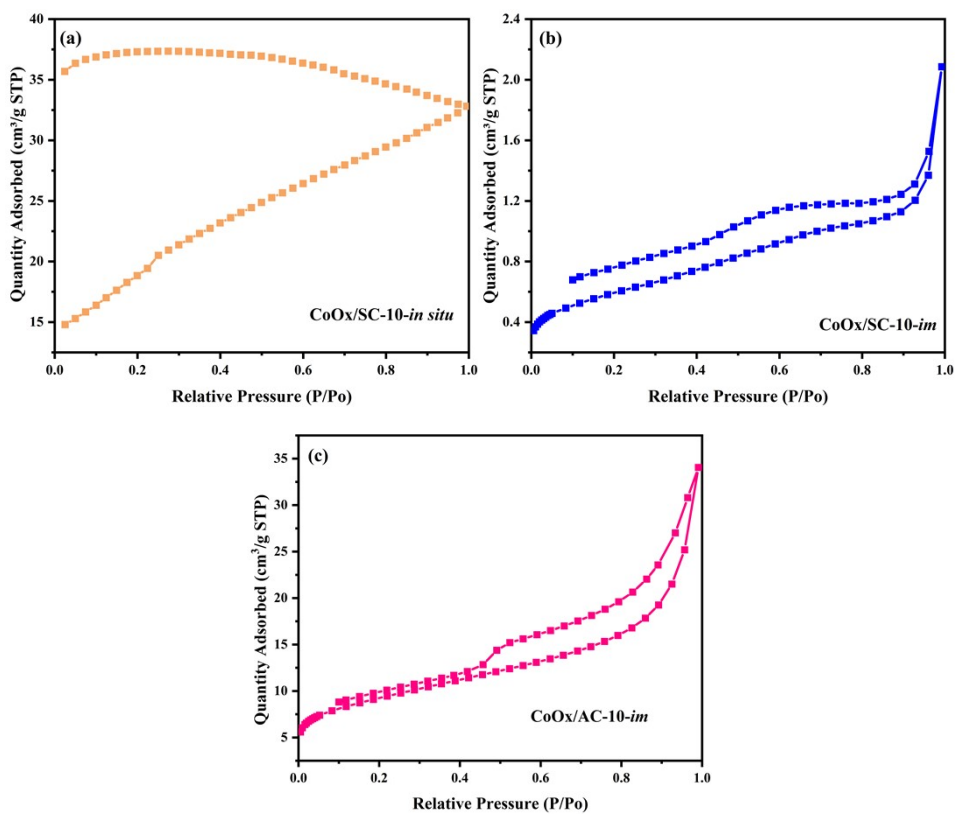

Fig.S3 N<sub>2</sub> adsorption-desorption isotherms of (a) CoO<sub>x</sub>/SC-10-*in situ*, (b) CoO<sub>x</sub>/SC-10-*im*, (c) CoO<sub>x</sub>/AC-10-*im*.

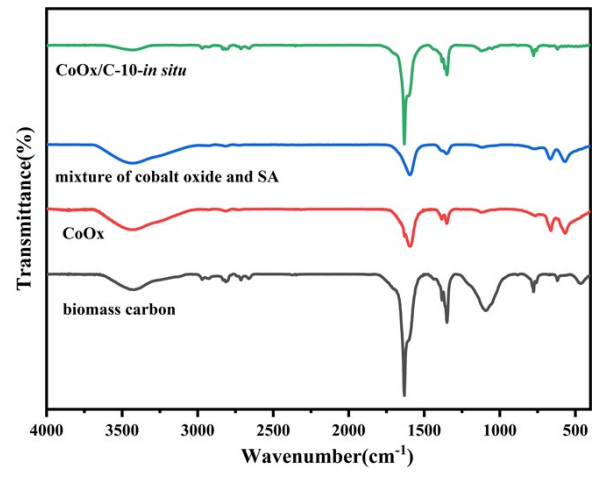

Fig.S4 FT-IR spectra of the samples.

### 3.2. Evaluation of catalytic oxidation performance

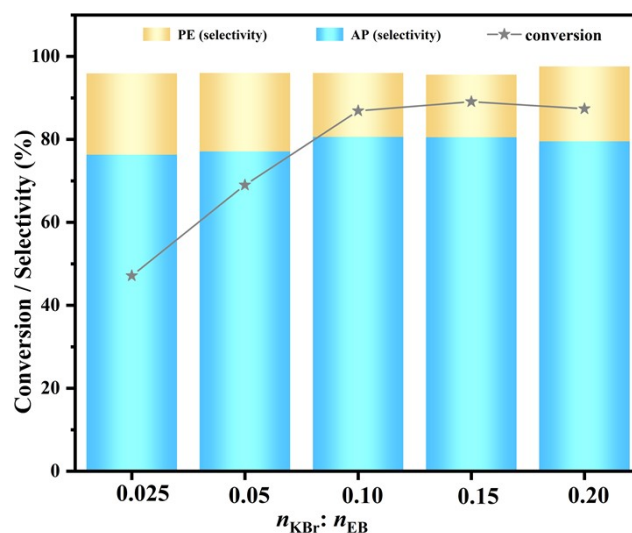

Fig.S5 The effect of the amount of additives (KBr).

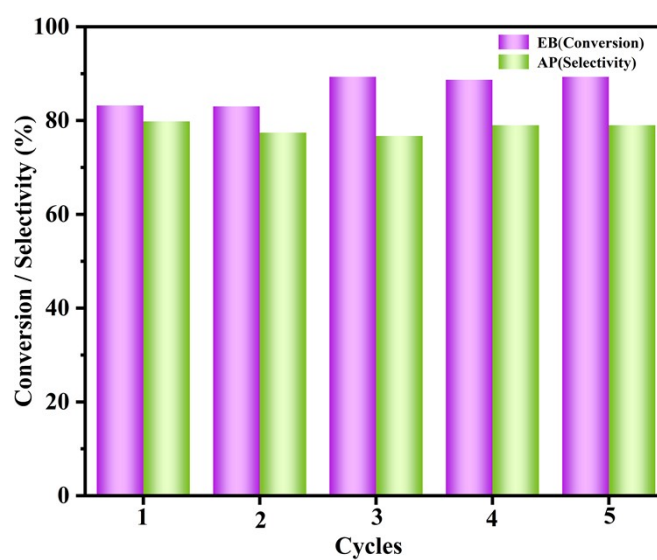

Fig.S6 Reusability of  $\text{CoO}_x/\text{SC-10}$ -*in situ* catalyst for EB oxidation. Reaction conditions:  $T=80\text{ }^\circ\text{C}$ ,  $m_{\text{catalyst}} : m_{\text{EB}}=0.15$ ,  $n_{\text{H}_2\text{O}_2} : n_{\text{EB}} : n_{\text{KBr}}=14.4 : 1 : 0.1$ ,  $t=8\text{ h}$ ,  $V_{\text{EB}} : V_{\text{CH}_3\text{COOH}}=1 : 10$ ,  $n_{\text{EB}}=0.1 : 1$ .

Table S2 Comparison of literature catalysts in the EB oxidation reaction

| Entry | Catalyst                                                       | solvent               | oxidant        | Time /h | Temperature/ °C | Con./%(EB ) | Sel./%(A P) | Literature |
|-------|----------------------------------------------------------------|-----------------------|----------------|---------|-----------------|-------------|-------------|------------|
| 1     | Ag/SiO <sub>2</sub>                                            | chlorobenzene         | TBHP           | 12      | 120             | 38          | 33.4        | 1          |
| 2     | Mn/MCM-41                                                      | 50 vol.% acetonitrile | TBHP           | 6       | 80              | 57.7        | 82.2        | 2          |
| 3     | SiO <sub>2</sub> /Al <sub>2</sub> O <sub>3</sub> -APTMS-BPK-Co |                       | TBHP           | 24      | 80              | 69          | 92          | 3          |
| 4     | CoO-β                                                          |                       | O <sub>2</sub> | 6       | 160             | 34.6        | 72.9        | 4          |
| 5     | Co-N-S-C-700                                                   |                       | O <sub>2</sub> | 5       | 120             | 48          | 85          | 5          |
| 6     | Co/AC-salen-400                                                |                       | TBHP           | 4       | 80              | 47.9        | 83.5        | 6          |
| 7     | Co-MCM-41(100)                                                 |                       | TBHP           | 24      | 80              | 26          | 85          | 1          |
| 8     | Ni/13USY                                                       |                       | O <sub>2</sub> | 5       | 150             | 21.4        | 76.5        | 7          |

### 3.3. Reaction mechanism

Table S3 The activity data of EB oxidation in different solvents using CoO<sub>x</sub>/SC-10-*in situ*.

| Entry | solvent                                   | Con. <sup>a</sup> (%) | Sel. <sup>b</sup> (%) |
|-------|-------------------------------------------|-----------------------|-----------------------|
| 1     | 2.5mL acetic acid                         | 75.12                 | 81.06                 |
| 2     | 2.5mL acetic acid and 1.5mL alcohol       | 73.27                 | 55.82                 |
| 3     | 2.5mL alcohol                             | 17.24                 | 12.53                 |
| 4     | 2.5mL acetonitrile                        |                       |                       |
| 5     | 2.5mL acetonitrile and 0.02mLHCl(12mol/L) | 66.61                 | 73.56                 |

Reaction conditions: T=80 °C, m<sub>catalyst</sub> : m<sub>EB</sub>=0.15, t=4 h, V<sub>EB</sub>:V<sub>CH<sub>3</sub>COOH</sub>=1:10, n<sub>H<sub>2</sub>O</sub>:n<sub>KBr</sub> : n<sub>EB</sub>=0.1 : 1. <sup>a</sup> Conversion of EB. <sup>b</sup> Selectivity of AP.

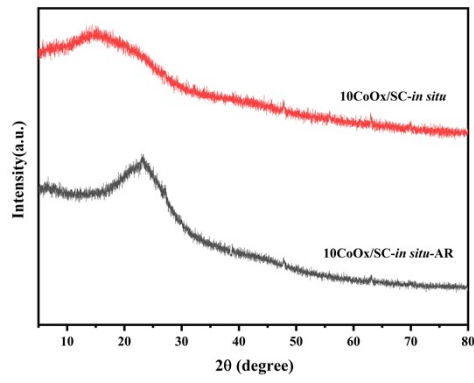

Fig.S7 XRD patterns of  $\text{CoO}_x/\text{SC}$ -10-*in situ* and  $\text{CoO}_x/\text{SC}$ -10-*in situ*-AR.

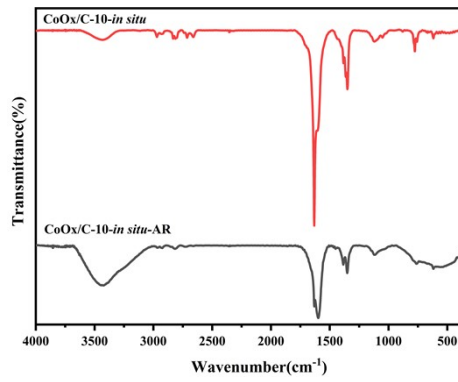

Fig.S8 FT-IR spectra of  $\text{CoO}_x/\text{SC}$ -10-*in situ* and  $\text{CoO}_x/\text{SC}$ -10-*in situ*-AR.

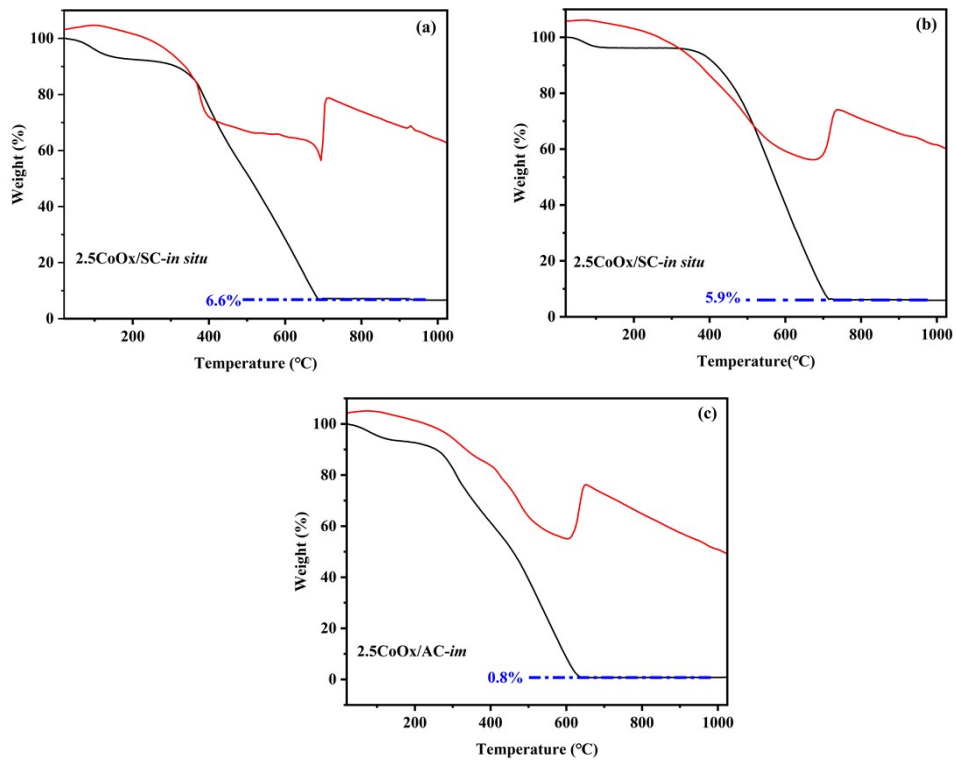

Fig.S9 TG-DSC curves of different samples (a)  $2.5\text{CoO}_x/\text{SC}$ -*in situ*, (b)  $2.5\text{CoO}_x/\text{SC}$ -*im*, (c)  $2.5\text{CoO}_x/\text{AC}$ -*im*.

## Notes and references

- 1 S. S. Bhoware and A. Singh, *J. Mol. Catal. A-Chem.*, 2007, **266**, 118-130.
- 2 K. Parida and S. S. Dash, *J. Mol. Catal. A-Chem.*, 2009, **306**, 54-61.
- 3 D. Habibi and A. R. Faraji, *C.R. Chim.*, 2013, **16**, 888-896.
- 4 G. Zhang, D. Wang, P. Feng, S. Shi, C. Wang, A. Zheng, G. Lü and Z. Tian, *Chinese J. Catal.*, 2017, **38**, 1207-1215.
- 5 W. Yan, Z. H. Chen, J. Huang, G. J. Li, J. L. Cao, B. Zhang, X. Y. Chen, H. L. Zhang and J. Lei, *T. Nonferr. Metal. Soc.*, 2018, **28**, 2265-2273.
- 6 K. Nakatsuka, T. Yoshii, Y. Kuwahara, K. Mori and H. Yamashita, *Phys. Chem. Chem. Phys.*, 2017, **19**, 4967-4974.
- 7 S. U. Nandanwar, S. Rathod, V. Bansal and V. V. Bokade, *Catal. Lett.*, 2021, **151**, 2116-2131.
